# Supplementary material
Source: Research Square preprint supplement (doi:10.21203/rs.3.rs-9181103/v2)
Supplement: Supplementary file 1 [file ac82f1b6fe2ab2a9bea66a4b.pdf]

## **Supplementary Information:**

# **Growth projections of hydrogen electrolysis worldwide with evidence from historical analogs and hindcasting**

Authors: **Nik Zielonka<sup>1,\*</sup>**, **Jenna Greene<sup>2</sup>**, **Gregory F. Nemet<sup>2,3</sup>**, **Evelina Trutnevyte<sup>1</sup>**

<sup>1</sup> Renewable Energy Systems, Institute for Environmental Sciences (ISE), Section of Earth and Environmental Sciences, University of Geneva, Switzerland

<sup>2</sup> Nelson Institute Center for Sustainability and the Global Environment, University of Wisconsin-Madison, Madison, WI 53726, United States of America

<sup>3</sup> La Follette School of Public Affairs, University of Wisconsin-Madison, Madison, WI 53706, United States of America

\* corresponding author (University of Geneva, Boulevard Carl Vogt 66, CH-1211 Geneva 4, Switzerland; +41 22 379 08 26; [Nik.Zielonka@unige.ch](mailto:Nik.Zielonka@unige.ch))

## **Supplementary Methods**

### **S1 – Selection of analogs**

We derive a list of historical analogs (Table 1) from the HATCH 2.0<sup>1</sup> dataset for each target technology (solar PV, onshore wind power, hydrogen electrolysis) by systematically repeating three steps for each target technology and analog group ('type of adopter', 'complexity' and 'material use'). Before the steps, we filter by the category 'technology lifetime' and set it to include all analogs with lifetimes ranging from several years to decades. All our three target technologies have expected lifetimes at the scale of multiple years to decades<sup>1-3</sup>.

1. We only keep analogs where time series exist in the dataset for at least 50 countries that also have solar PV for higher sample size for our analysis. Similarly, we filter for at least 40 countries for onshore wind power, and 50 for hydrogen electrolysis.
2. We use the three categories 'type of adopter', 'complexity' and 'material use' to identify three groups of analogs. All analogs within one group must fall into the same categorical bin of a group's category than the target technology (S2 – Technology characteristics).
3. To avoid double-counting of technologies, we remove analogs from the filtered analog groups that either comprise more than one technology (i.e., electricity, renewable power, solid biofuels) or are a different unit of an analog that is already in the group (i.e., Hepatitis B first dose vaccine). Further, we remove solar PV from the analogs for solar PV, and onshore wind power from the analogs for onshore wind power to avoid information leakage.

### **S2 – Technology characteristics**

In line with Greene et al.<sup>1</sup>, all analogs and target technologies fall into one of three categorical bins per technology characteristic. The type of adopter is either individuals, firms, or both individuals and firms, and has been defined through expert judgement. The complexity based on Malhotra and Schmidt<sup>4</sup> is either simple, i.e., less than 1,000 components, design-intensive, i.e., between 1,000 and 1,000,000 components, or complex, i.e., over a million components. The material use is either low, i.e., less than 0.1 kg per USD, medium, i.e., between 0.1 and 1 kg per USD, or high, i.e., over 1 kg per USD. Based on these criteria, the target technologies

fall into the following bins of technology characteristics that we use in step 3 of our selection process (S1 – Selection of analogs, Table 1):

Solar PV (as in HATCH 2.0<sup>1</sup>):

- Type of adopter: Both firms and individuals.
- Complexity: Simple.
- Material use: Medium.

Onshore wind power (as in HATCH 2.0<sup>1</sup>):

- Type of adopter: Firms.
- Complexity: Design-intensive.
- Material use: Medium.

Hydrogen electrolysis:

- Type of adopter: Firms.
- Complexity: Complex. This categorization agrees with similar technologies like biogas and solid biofuels in HATCH 2.0<sup>1</sup>.
- Material use: High. This categorization is based on the material intensity of 1.047 kg/USD that we calculate from 7.12 USD/MMBTU<sup>5,6</sup> and conversion<sup>7</sup> with HHV.

## Supplementary Figures

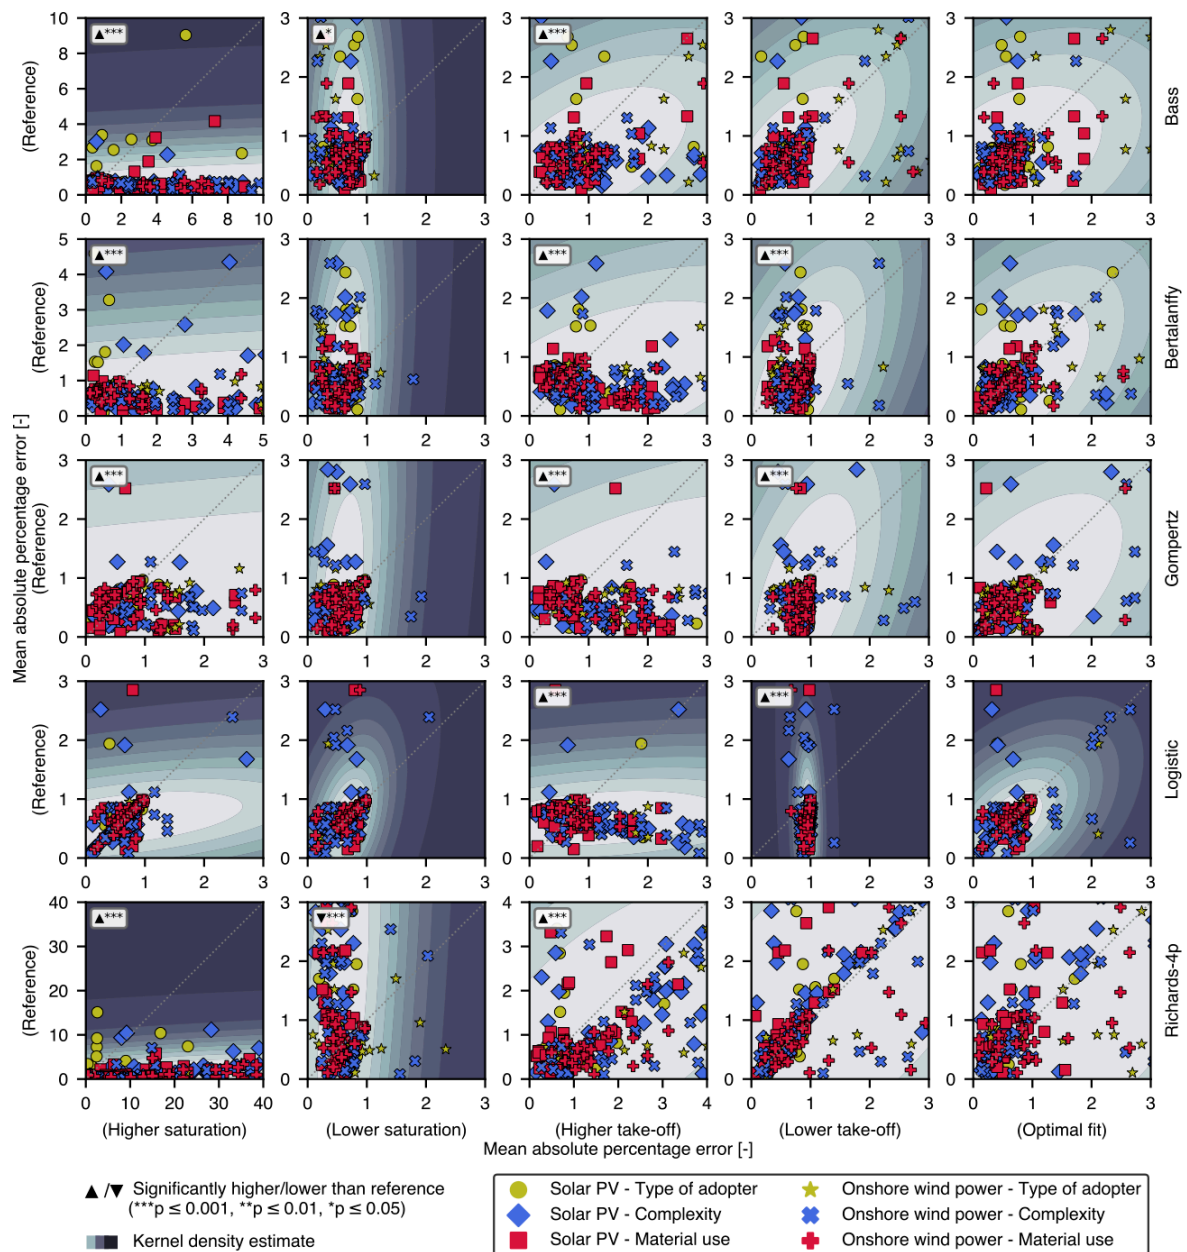

Supplementary Figure 1. Comparison of mean absolute percentage errors (in relative numbers) from out-of-sample testing in hindcasting across all investigated model settings and the reference. Each marker represents one country while colors and shapes of markers distinguish three different groups of analogs and the projected technologies solar PV and onshore wind power, respectively. The higher the mean error, the further away is the median of the projections from the historically observed capacities between the take-off year of a technology in a country and 2023. Each plot compares the reference setting of diffusion attributes (i.e., medium capacity at saturation, medium capacity at take-off, and near-optimal curve fit) per growth model (Bass, Bertalanffy, Gompertz, Logistic, Richards-4p) with changes in diffusion attributes: higher/lower capacities at saturation (i.e., take-off at 0.1%/5% of saturation), higher/lower capacities at take-off (i.e., take-off multiplied by 0.1/5), and optimal curve fits per growth model (Methods). A marker on the diagonal means there is no difference between the reference setting and the change. Arrows indicate with different significance levels from Mann-Whitney U tests if changing diffusion attributes compared to the reference setting leads to higher/lower median mean absolute percentage errors. Color shading shows the density of markers in the plots. For visibility,

markers with the highest 25% in mean absolute percentage error lay outside the plots. Figure 2 compares calibration penalties and Supplementary Figure 2 compares sharpness penalties.

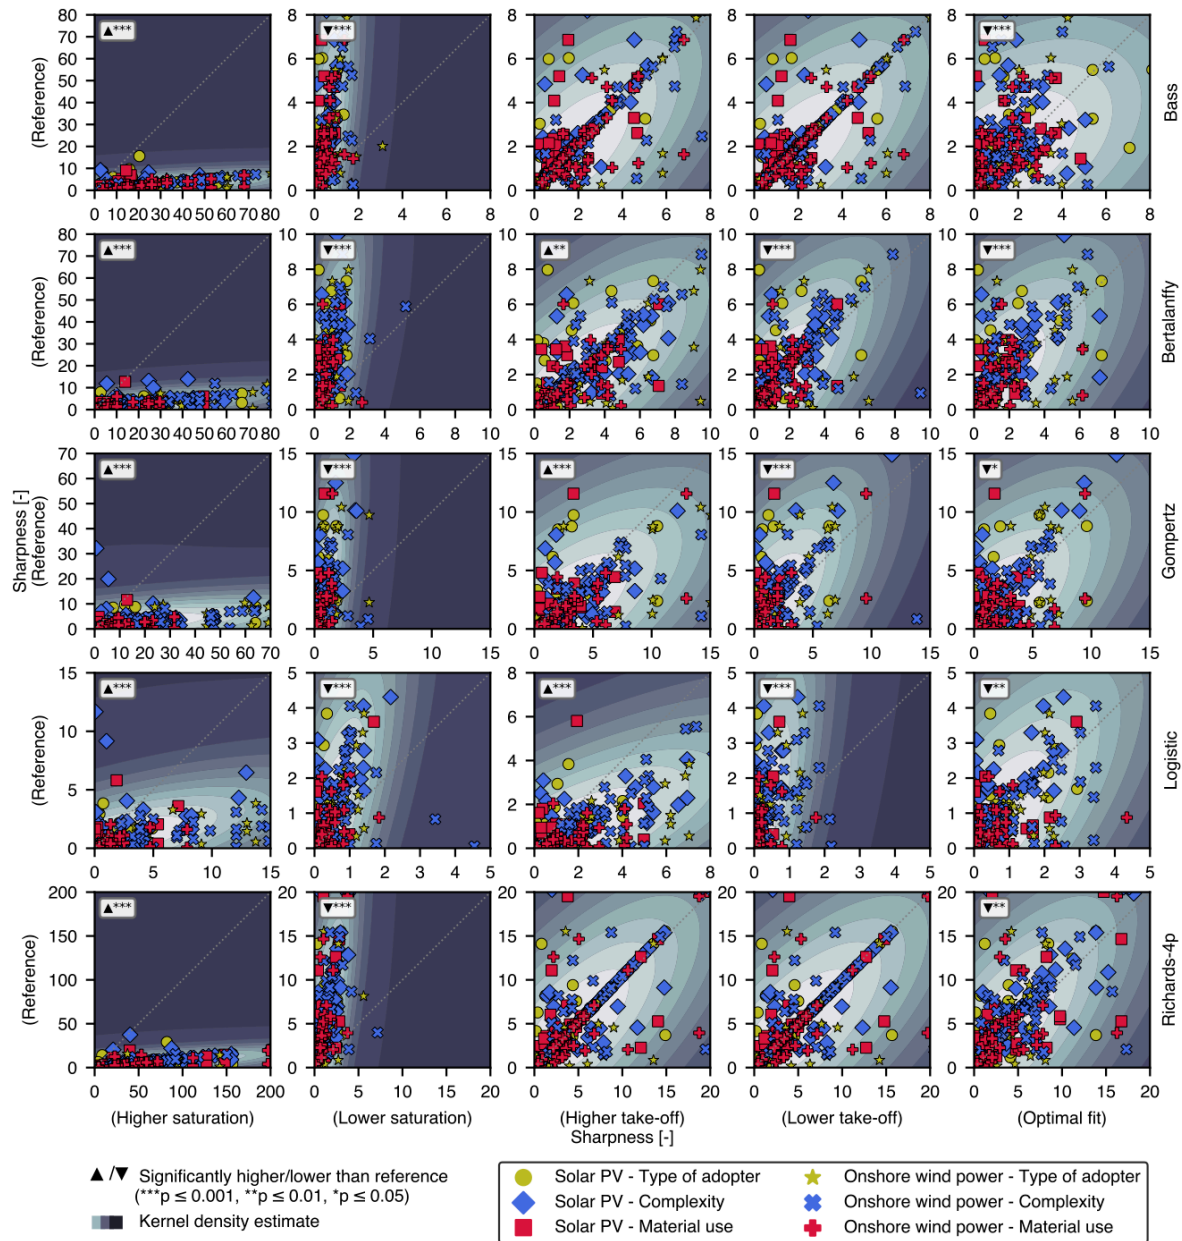

Supplementary Figure 2. Comparison of sharpness penalties from out-of-sample testing in hindcasting across all investigated model settings and the reference. Each marker represents one country while colors and shapes of markers distinguish three different groups of analogs and the projected technologies solar PV and onshore wind power, respectively. The higher the sharpness penalty<sup>65,66</sup>, the wider are the probabilistic density intervals of the projections between the take-off year of a technology in a country and 2023. Each plot compares the reference setting of diffusion attributes (i.e., medium capacity at saturation, medium capacity at take-off, and near-optimal curve fit) per growth model (Bass, Bertalanffy, Gompertz, Logistic, Richards-4p) with changes in diffusion attributes: higher/lower capacities at saturation (i.e., take-off at 0.1%/5% of saturation), higher/lower capacities at take-off (i.e., take-off multiplied by 0.1/5), and optimal curve fits per growth model (Methods). A marker on the diagonal means there is no difference between the reference setting and the change. Arrows indicate with different significance levels from Mann-Whitney U tests if changing diffusion attributes compared to the reference setting leads to higher/lower median sharpness penalties. Color shading shows the density of markers in the plots. For visibility, markers with the highest 5% in sharpness lay outside the plots. Figure 2 compares calibration penalties and Supplementary Figure 1 compares mean absolute percentage errors.

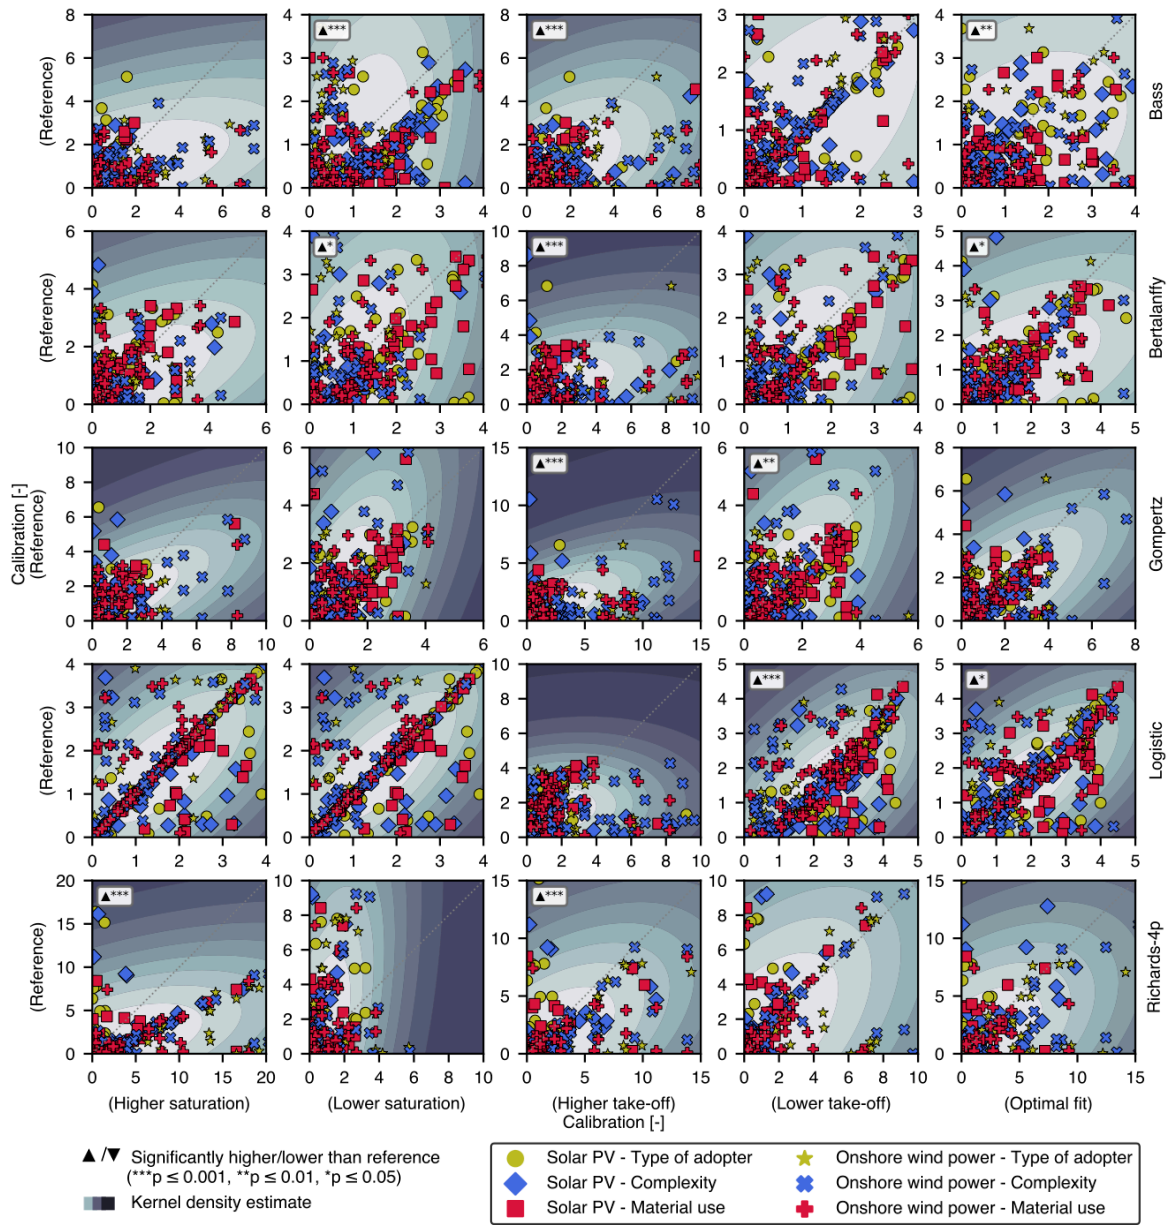

Supplementary Figure 3. Comparison of calibration penalties from out-of-sample testing in hindcasting across all investigated model settings with intermediate capacity changes and the reference. Each marker represents one country while colors and shapes of markers distinguish three different groups of analogs and the projected technologies solar PV and onshore wind power, respectively. The higher the calibration penalty<sup>65,66</sup>, the lower the out-of-sample accuracy of the projections between the take-off year of a technology in a country and 2023. Each plot compares the reference setting of diffusion attributes (i.e., medium capacity at saturation, medium capacity at take-off, and near-optimal curve fit) per growth model (Bass, Bertalanffy, Gompertz, Logistic, Richards-4p) with changes in diffusion attributes: higher/lower capacities at saturation (i.e., take-off at 0.5%/2.5% of saturation), higher/lower capacities at take-off (i.e., take-off multiplied by 0.5/2.5), and optimal curve fits per growth model (Methods). A marker on the diagonal means there is no difference between the reference setting and the change. Arrows indicate with different significance levels from Mann-Whitney U tests if changing diffusion attributes compared to the reference setting leads to higher/lower median calibration penalties. Color shading shows the density of markers in the plots. For visibility, markers with the highest 5% in calibration lay outside the plots. Supplementary Figures 4-5 compare mean absolute percentage errors and sharpness.

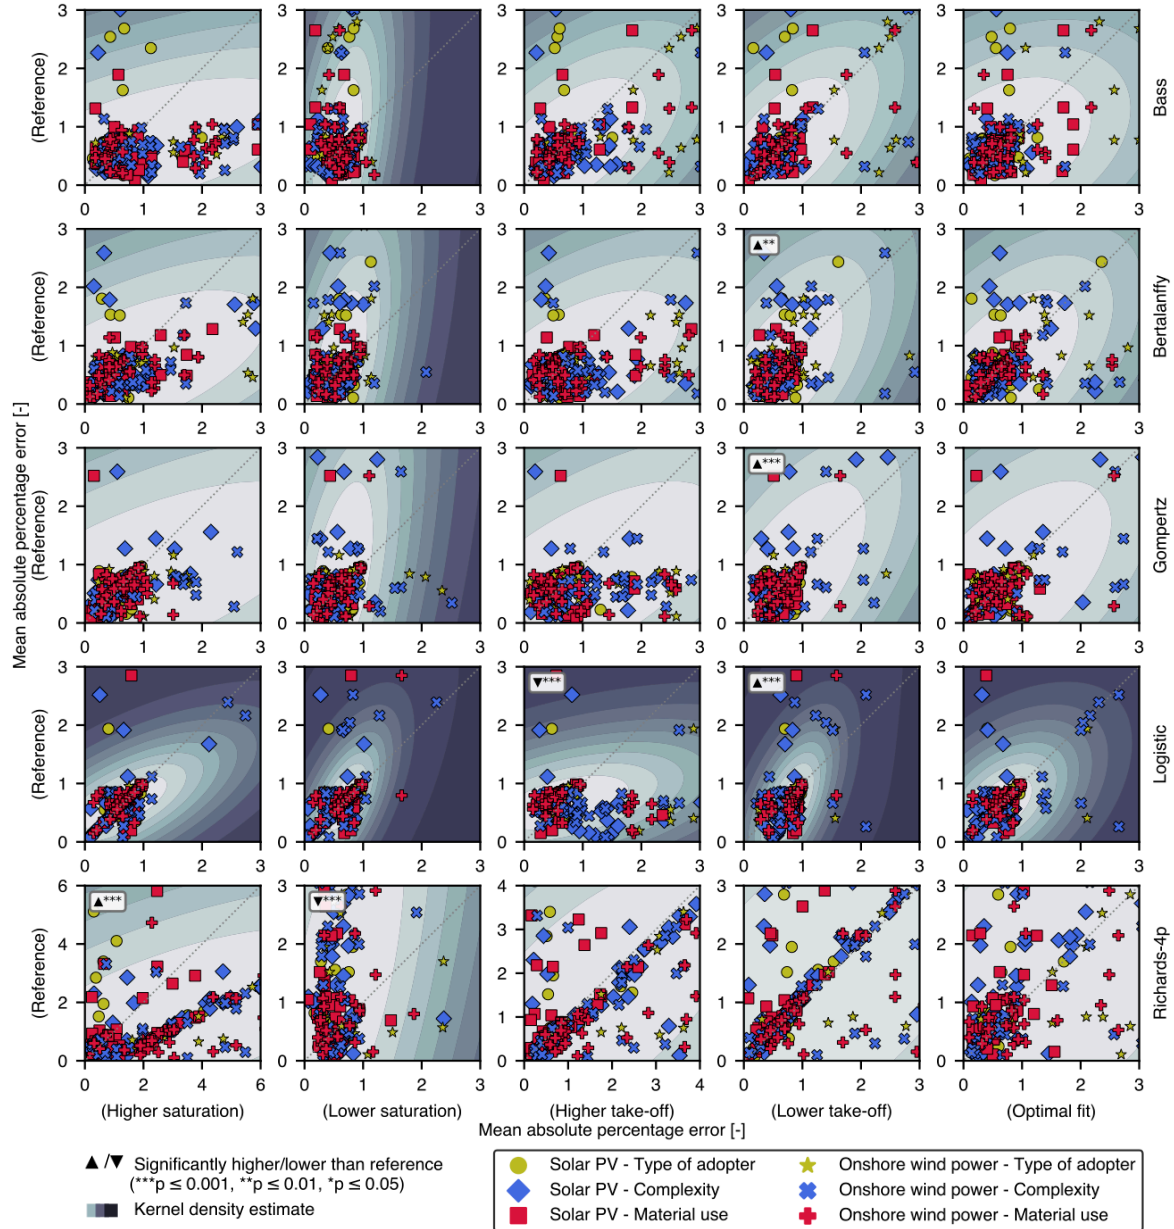

Supplementary Figure 4. Comparison of mean absolute percentage errors (in relative numbers) from out-of-sample testing in hindcasting across all investigated model settings with intermediate capacity changes and the reference. Each marker represents one country while colors and shapes of markers distinguish three different groups of analogs and the projected technologies solar PV and onshore wind power, respectively. The higher the mean error, the further away is the median of the projections from the historically observed capacities between the take-off year of a technology in a country and 2023. Each plot compares the reference setting of diffusion attributes (i.e., medium capacity at saturation, medium capacity at take-off, and near-optimal curve fit) per growth model (Bass, Bertalanffy, Gompertz, Logistic, Richards-4p) with changes in diffusion attributes: higher/lower capacities at saturation (i.e., take-off at 0.5%/2.5% of saturation), higher/lower capacities at take-off (i.e., take-off multiplied by 0.5/2.5), and optimal curve fits per growth model (Methods). A marker on the diagonal means there is no difference between the reference setting and the change. Arrows indicate with different significance levels from Mann-Whitney U tests if changing diffusion attributes compared to the reference setting leads to higher/lower median PV mean absolute percentage errors. Color shading shows the density of markers in the plots. For visibility, markers with the highest 25% in mean absolute percentage error lay outside the plots. Supplementary Figure 3 compares calibration penalties and Supplementary Figure 5 compares sharpness penalties.

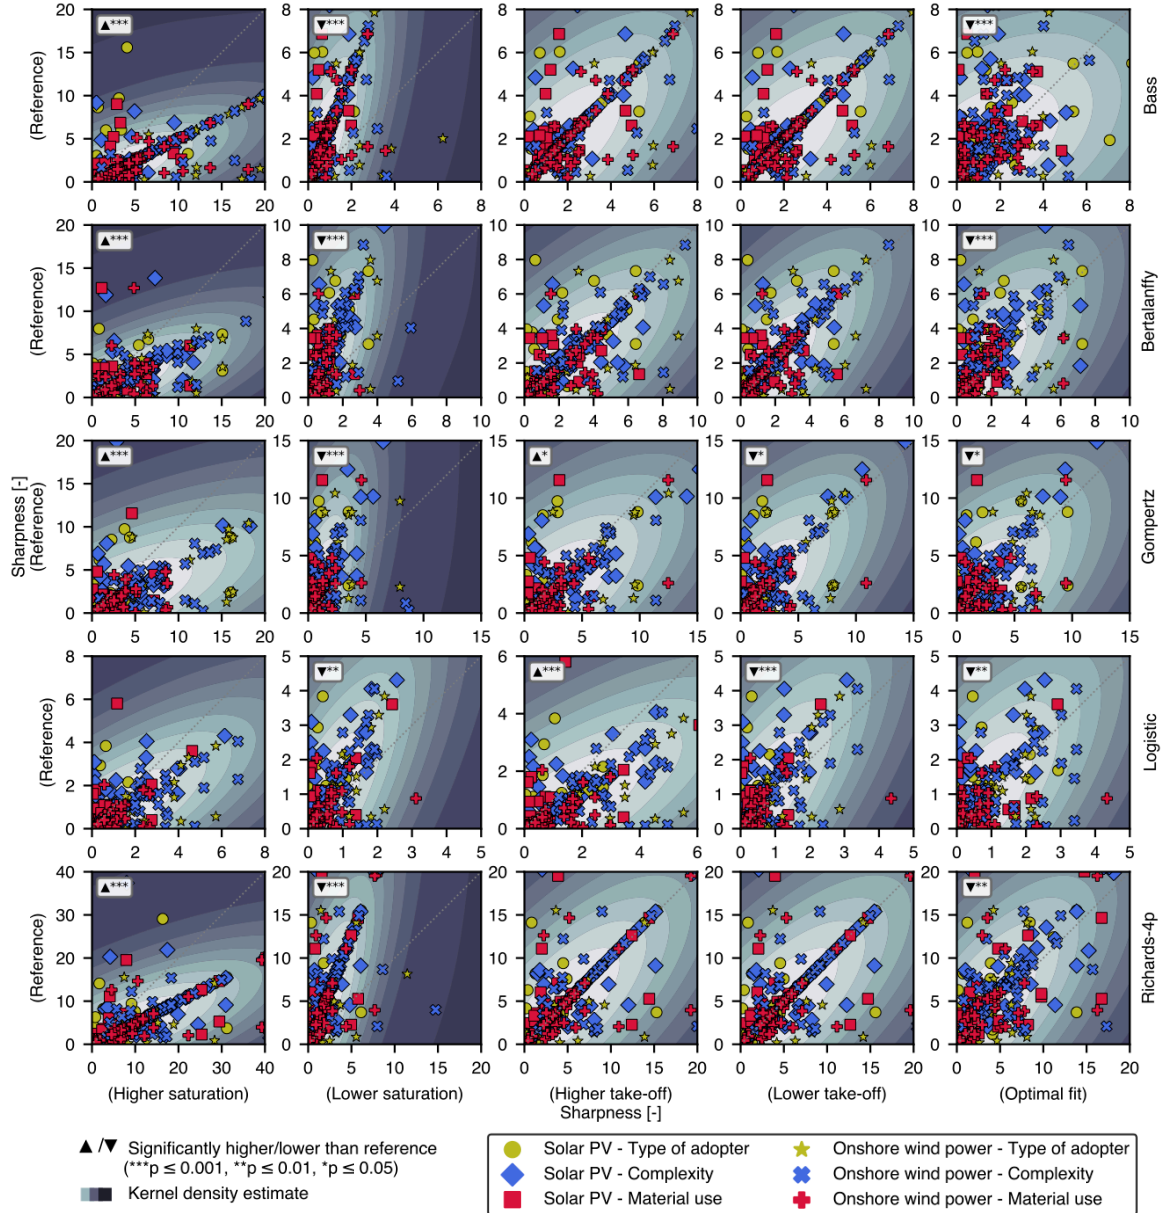

Supplementary Figure 5. Comparison of sharpness penalties from out-of-sample testing in hindcasting across all investigated model settings with intermediate capacity changes and the reference. Each marker represents one country while colors and shapes of markers distinguish three different groups of analogs and the projected technologies solar PV and onshore wind power, respectively. The higher the sharpness penalty<sup>65,66</sup>, the wider are the probabilistic density intervals of the projections between the take-off year of a technology in a country and 2023. Each plot compares the reference setting of diffusion attributes (i.e., medium capacity at saturation, medium capacity at take-off, and near-optimal curve fit) per growth model (Bass, Bertalanffy, Gompertz, Logistic, Richards-4p) with changes in diffusion attributes: higher/lower capacities at saturation (i.e., take-off at 0.5%/2.5% of saturation), higher/lower capacities at take-off (i.e., take-off multiplied by 0.5/2.5), and optimal curve fits per growth model (Methods). A marker on the diagonal means there is no difference between the reference setting and the change. Arrows indicate with different significance levels from Mann-Whitney U tests if changing diffusion attributes compared to the reference setting leads to higher/lower median sharpness penalties. Color shading shows the density of markers in the plots. For visibility, markers with the highest 5% in sharpness lay outside the plots. Supplementary Figure 3 compares calibration penalties and Supplementary Figure 4 compares mean absolute percentage errors.

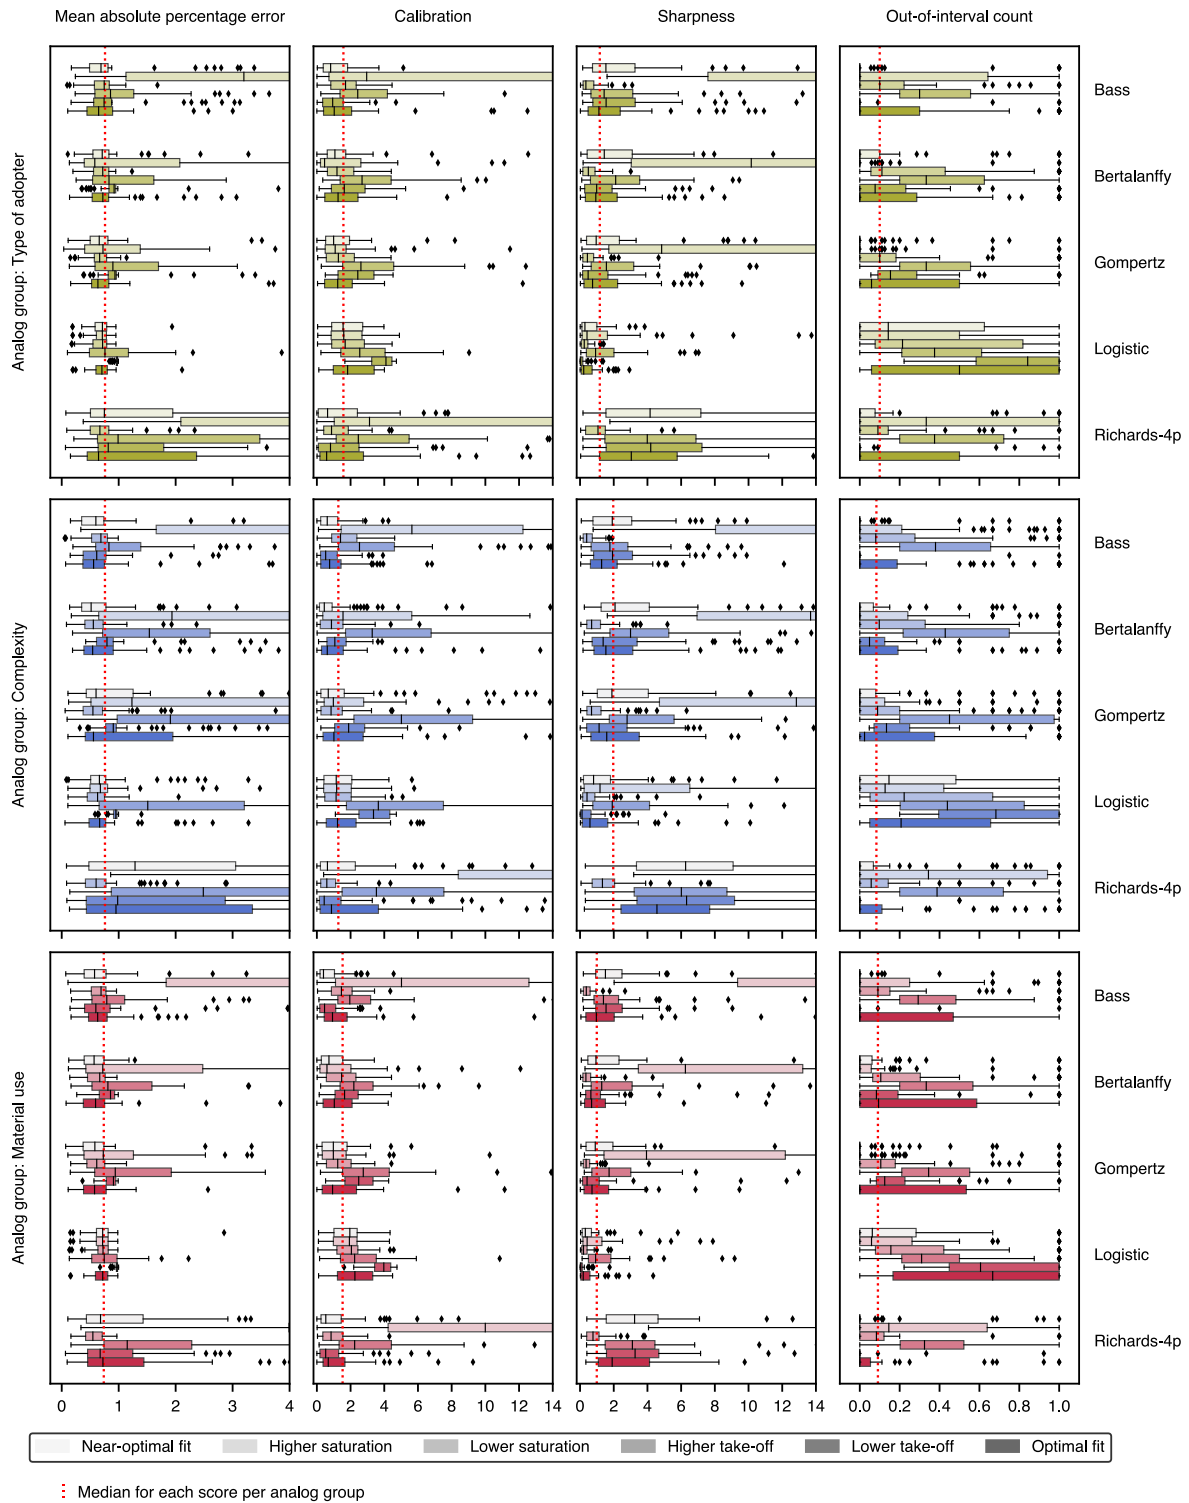

Supplementary Figure 6. Out-of-sample performance scores of projections across all countries of both solar PV and onshore wind power across, grouped by analog group, growth model, and diffusion attributes where near-optimal fit describes the reference. The higher the mean absolute percentage error, calibration penalty, sharpness penalty, or out-of-interval count, the lower the mean out-of-sample performance of the projections between the take-off year of a technology in a country and 2023. The box plots indicate median, first and third quartiles, and whiskers. Single dots are outliers and can lay outside the plot windows. Related to Figure 2.

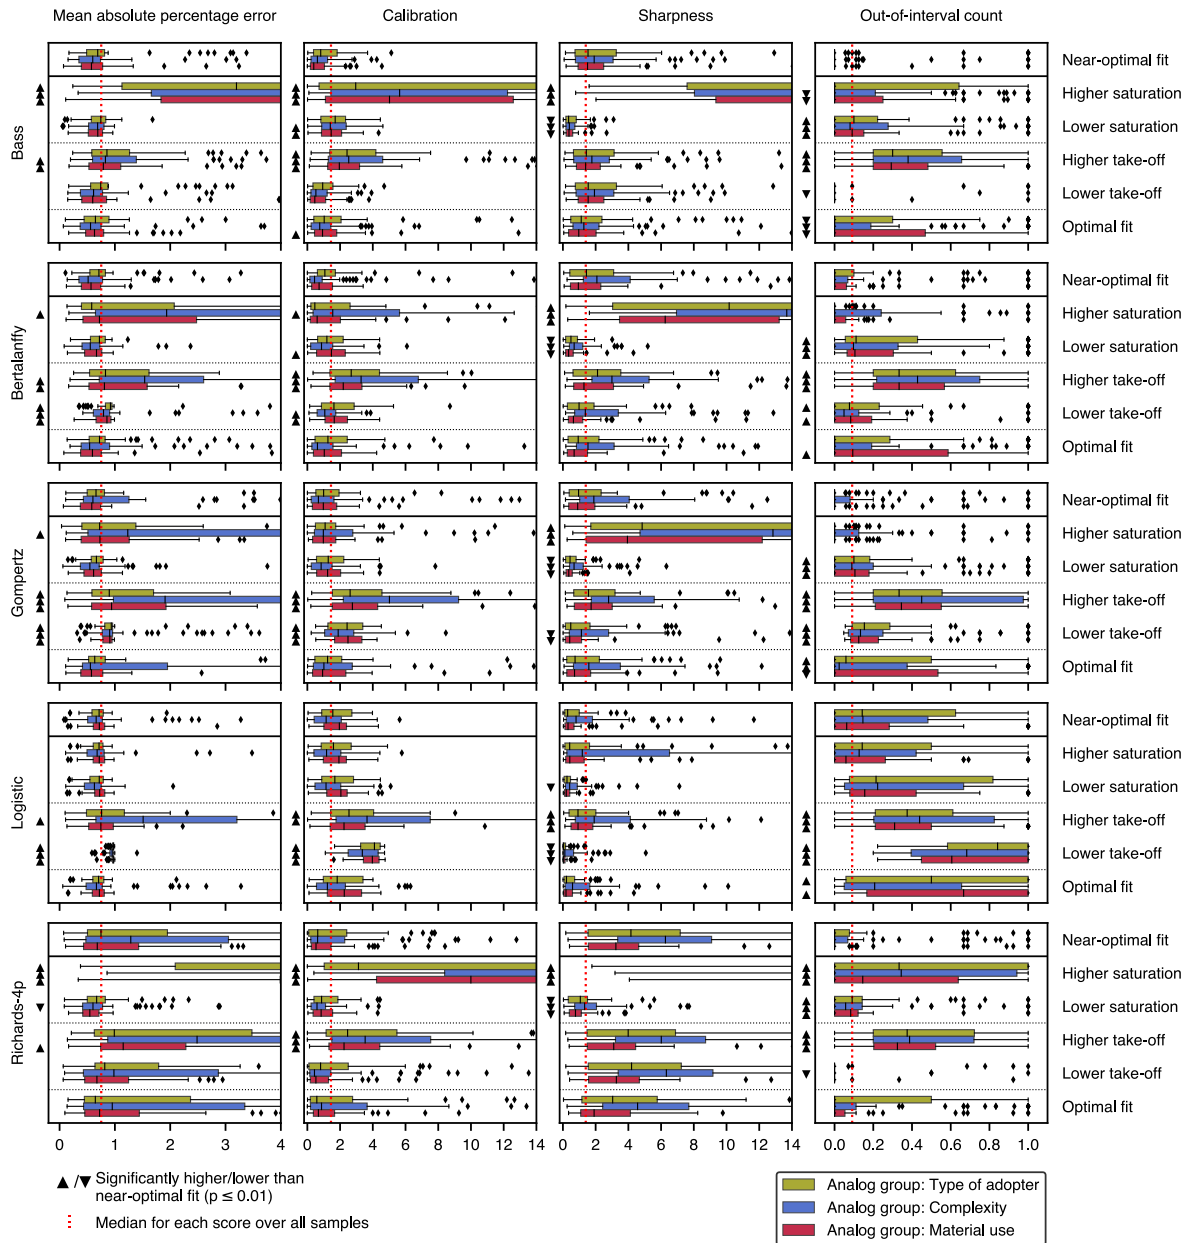

Supplementary Figure 7. Out-of-sample performance scores of projections across all countries of both solar PV and onshore wind power across, grouped by growth model, and diffusion attributes where near-optimal fit describes the reference, and analog group. The higher the mean absolute percentage error, calibration penalty, sharpness penalty, or out-of-interval count, the lower the mean out-of-sample performance of the projections between the take-off year of a technology in a country and 2023. The box plots indicate median, first and third quartiles, and whiskers. Single dots are outliers and can lay outside the plot windows. Arrows indicate if changing diffusion attributes compared to the reference setting (near-optimal fit) leads to significantly higher/lower median scores ( $p < 0.01$ , Mann-Whitney U test). Related to Figure 2.

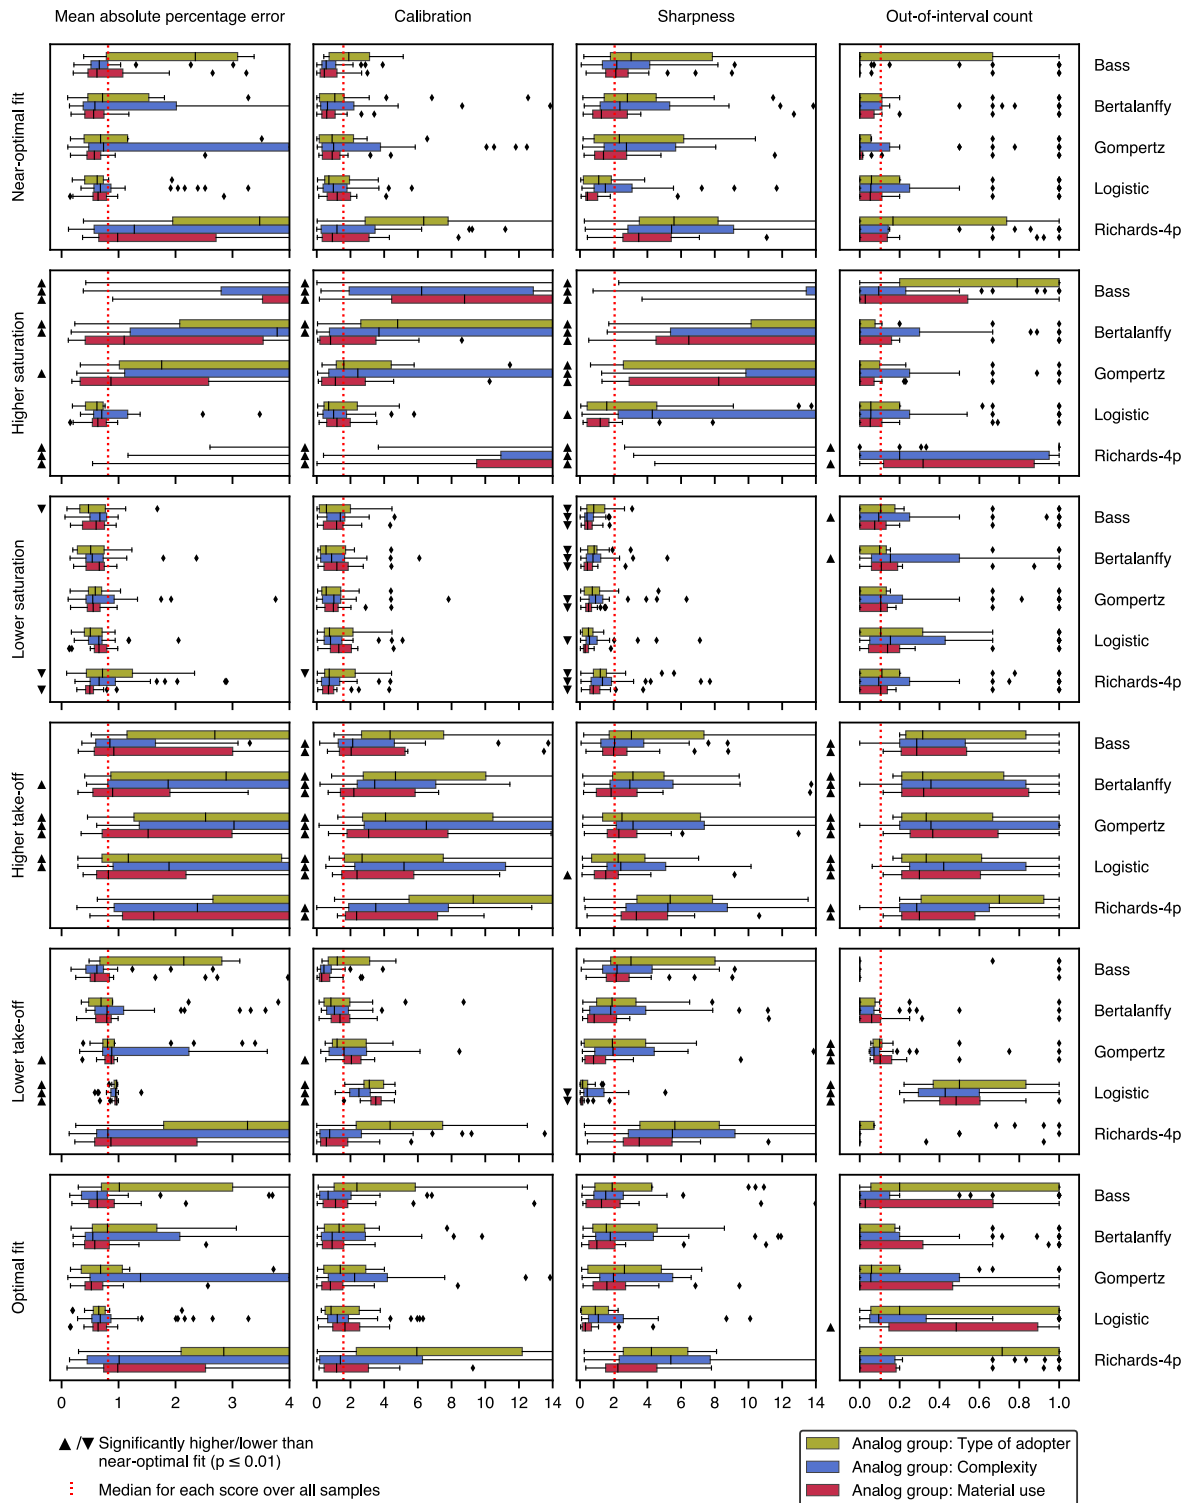

Supplementary Figure 8. Out-of-sample performance scores of projections across all countries of both solar PV and onshore wind power across, grouped by diffusion attributes where near-optimal fit describes the reference, analog group, and growth model. The higher the mean absolute percentage error, calibration penalty, sharpness penalty, or out-of-interval count, the lower the mean out-of-sample performance of the projections between the take-off year of a technology in a country and 2023. The box plots indicate median, first and third quartiles, and whiskers. Single dots are outliers and can lay outside the plot windows. Arrows indicate if changing diffusion attributes compared to the reference setting (near-optimal fit) leads to significantly higher/lower median scores ( $p < 0.01$ , Mann-Whitney U test). Related to Figure 2.

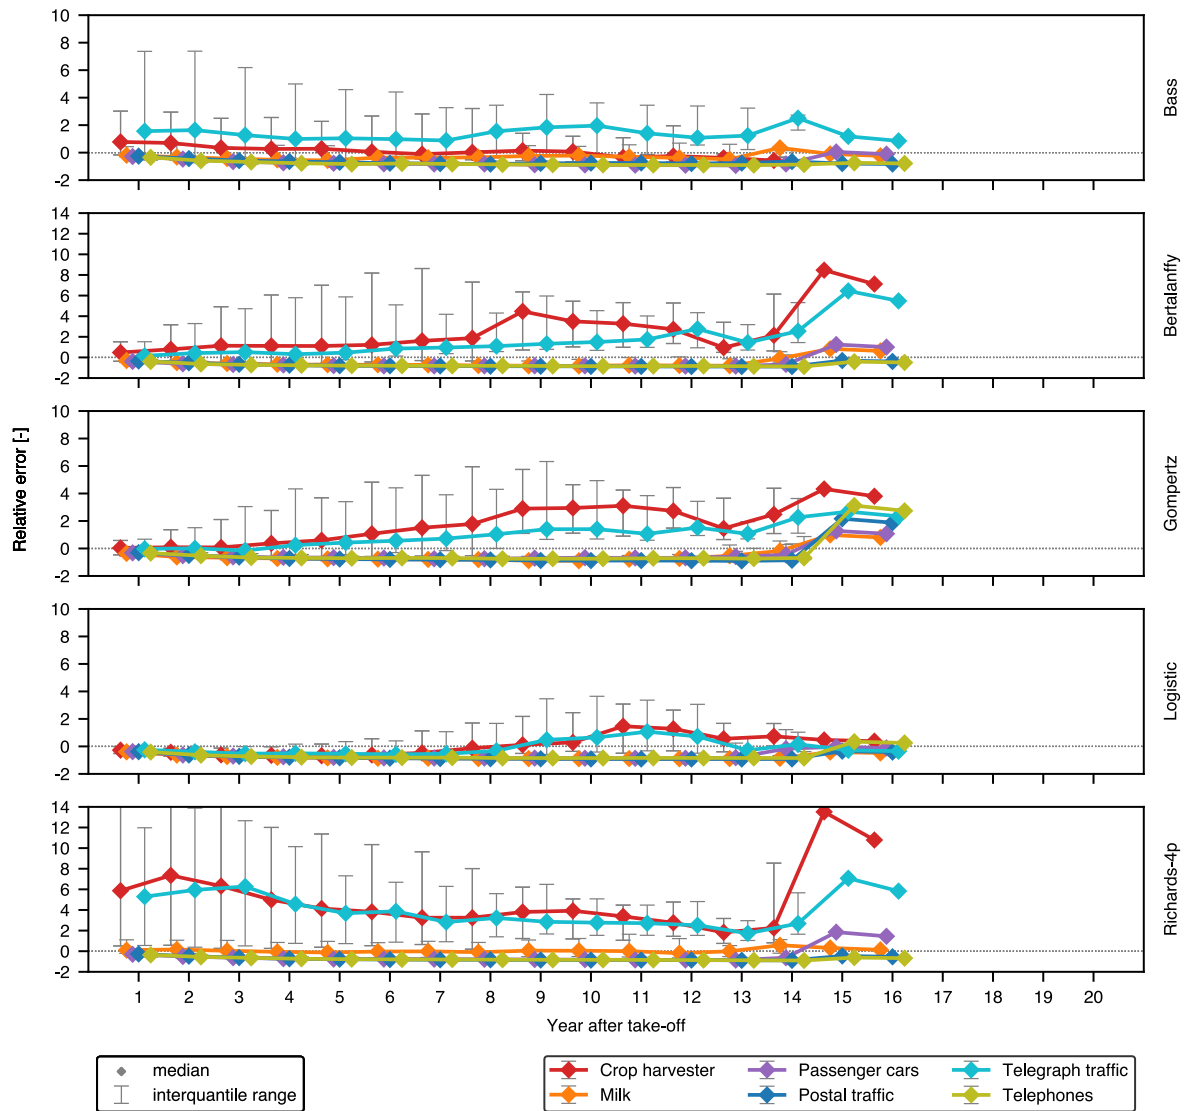

Supplementary Figure 9. Median relative errors with interquartile ranges for projections of growth models based on single analogs across all countries for solar PV. The analogs are part of the group with same type of adopter (Table 1). The higher the magnitude of the error, the further away is the projected capacity of solar PV from the historically observed capacity. If projected capacities are higher than the corresponding observations, errors are positive. The projected capacities are estimates of a deterministic projection using the substitution model and growth parameters from optimal fits of a growth model to the historical time series of an analog. Supplementary Figures 10-11 show percentage errors for other analogs. Supplementary Figures 12-14 show percentage errors for onshore wind power. Related to Figure 3.

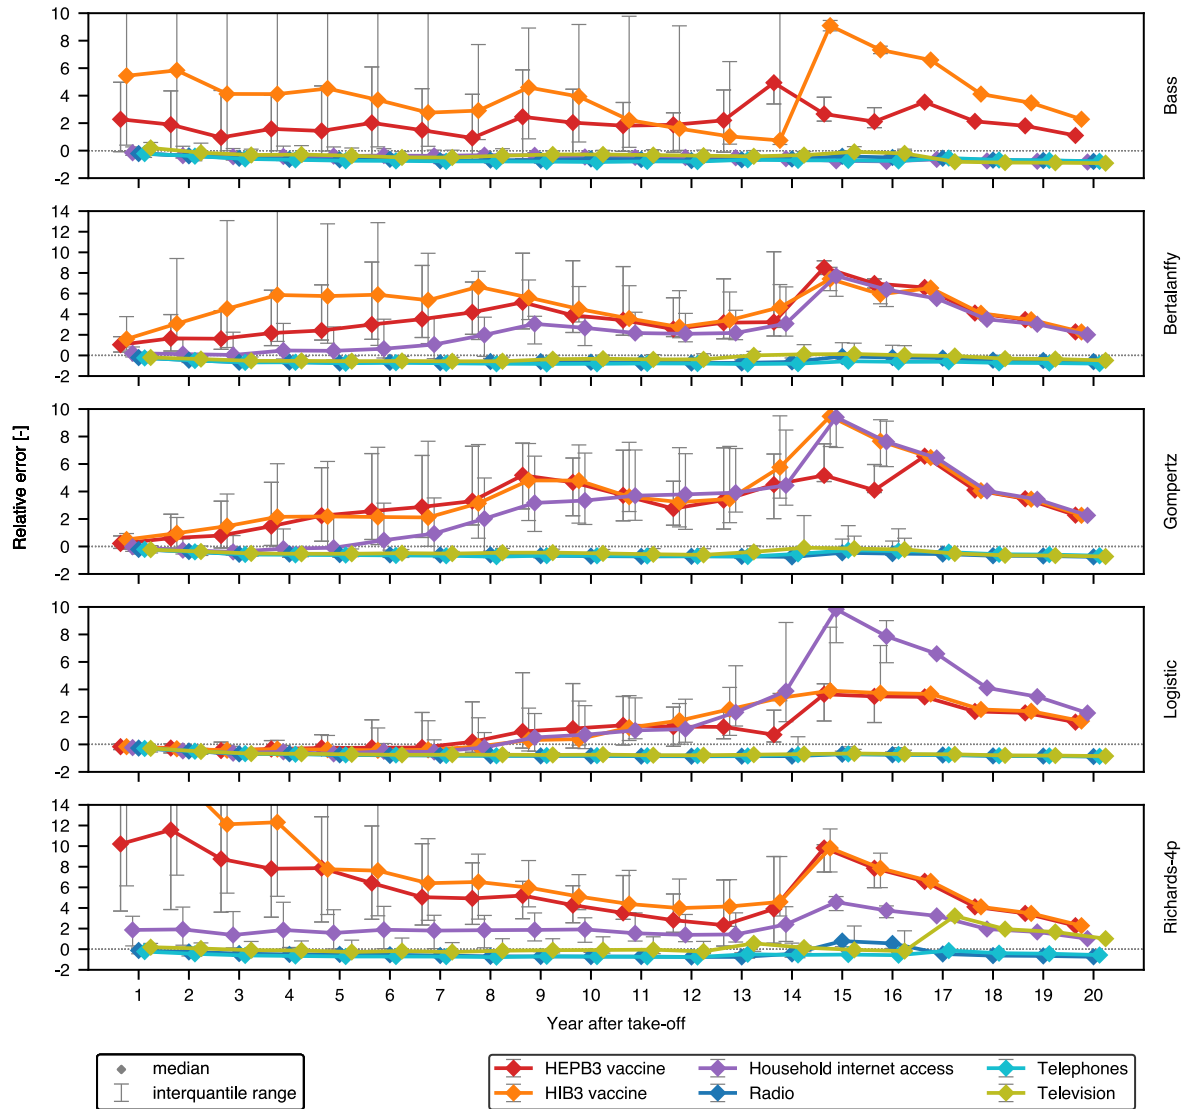

Supplementary Figure 10. Median relative errors with interquartile ranges for projections of growth models based on single analogs across all countries for solar PV. The analogs are part of the group with same magnitude of complexity (Table 1). The higher the magnitude of the error, the further away is the projected capacity of solar PV from the historically observed capacity. If projected capacities are higher than the corresponding observations, errors are positive. The projected capacities are estimates of a deterministic projection using the substitution model and growth parameters from optimal fits of a growth model to the historical time series of an analog. Supplementary Figures 9 and 11 show percentage errors for other analogs. Supplementary Figures 12-14 show percentage errors for onshore wind power. Related to Figure 3.

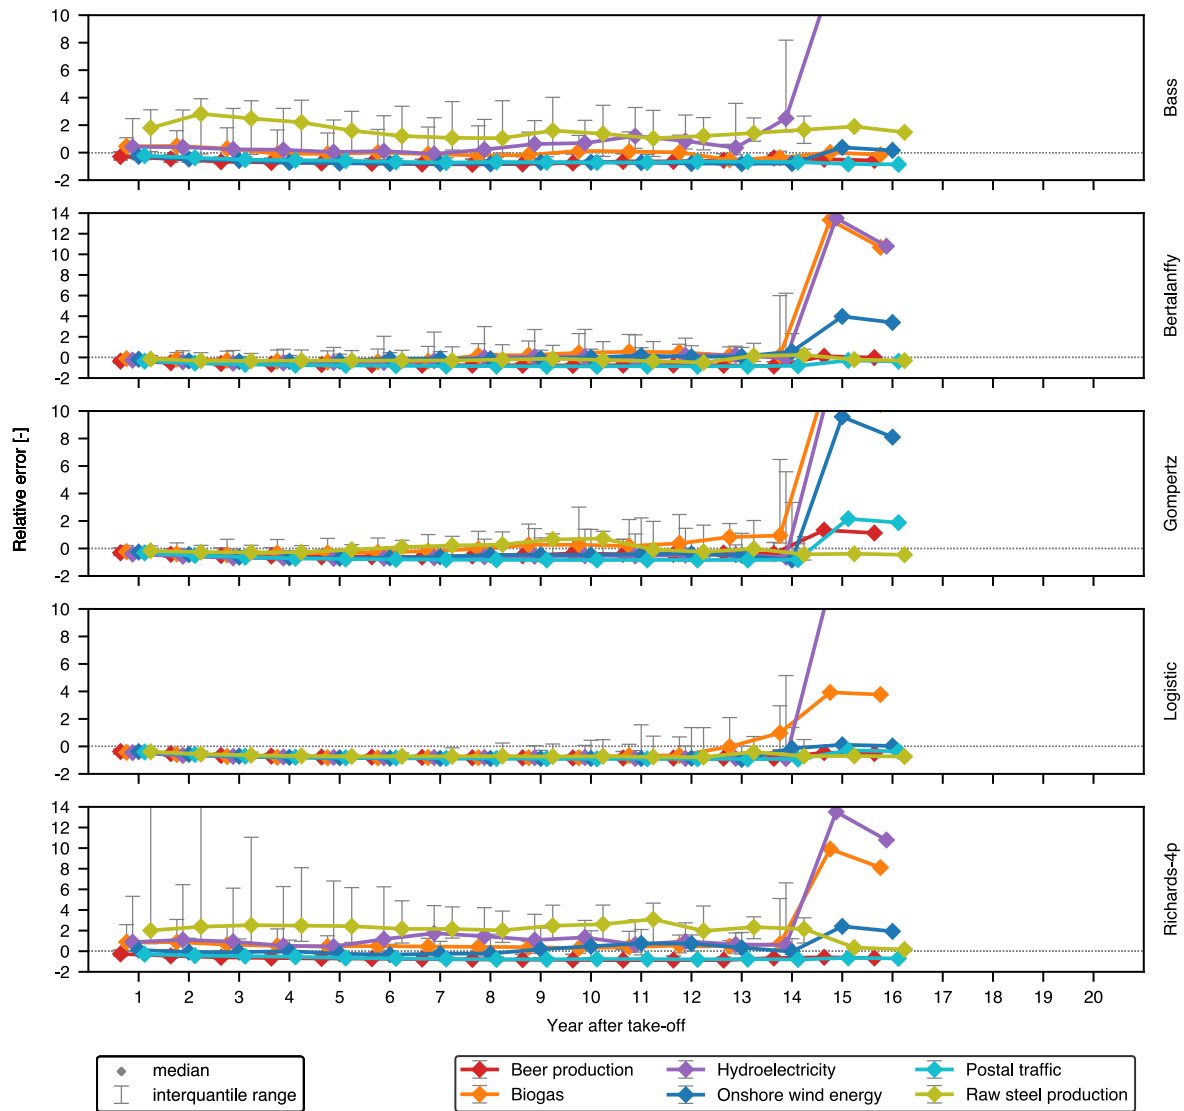

Supplementary Figure 11. Median relative errors with interquartile ranges for projections of growth models based on single analogs across all countries for solar PV. The analogs are part of the group with same magnitude of material use (Table 1). The higher the magnitude of the error, the further away is the projected capacity of solar PV from the historically observed capacity. If projected capacities are higher than the corresponding observations, errors are positive. The projected capacities are estimates of a deterministic projection using the substitution model and growth parameters from optimal fits of a growth model to the historical time series of an analog. Supplementary Figures 9-10 show percentage errors for other analogs. Supplementary Figures 12-14 show percentage errors for onshore wind power. Related to Figure 3.

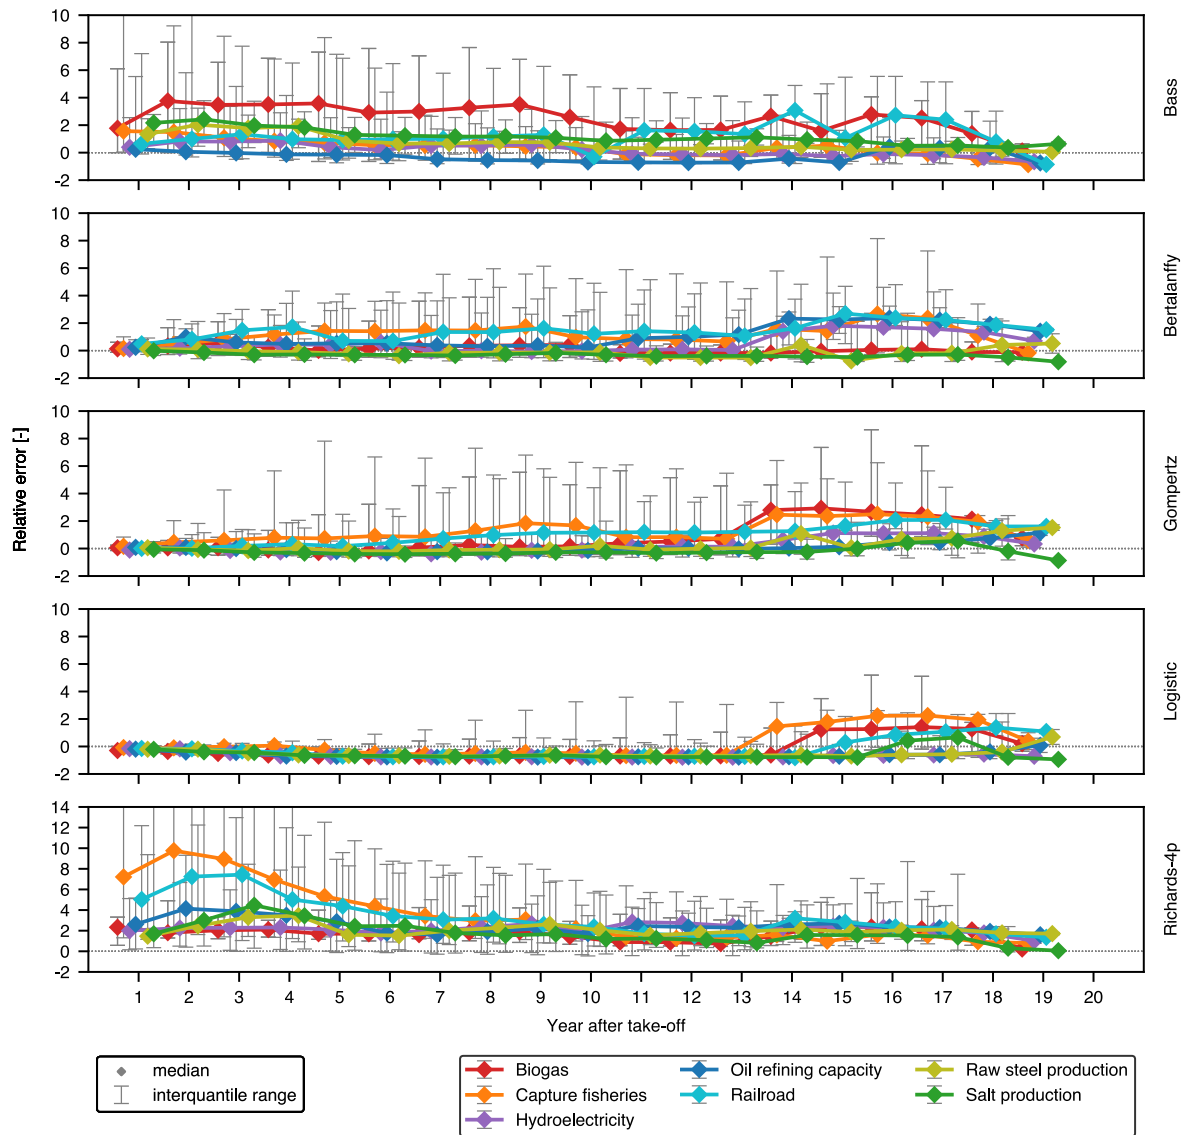

Supplementary Figure 12. Median relative errors with interquartile ranges for projections of growth models based on single analogs across all countries for onshore wind power. The analogs are part of the group with same type of adopter (Table 1). The higher the magnitude of the error, the further away is the projected capacity of onshore wind power from the historically observed capacity. If projected capacities are higher than the corresponding observations, errors are positive. The projected capacities are estimates of a deterministic projection using the substitution model and growth parameters from optimal fits of a growth model to the historical time series of an analog. Supplementary Figures 13-14 show percentage errors for other analogs. Supplementary Figures 9-11 show percentage errors for solar PV. Related to Figure 3.

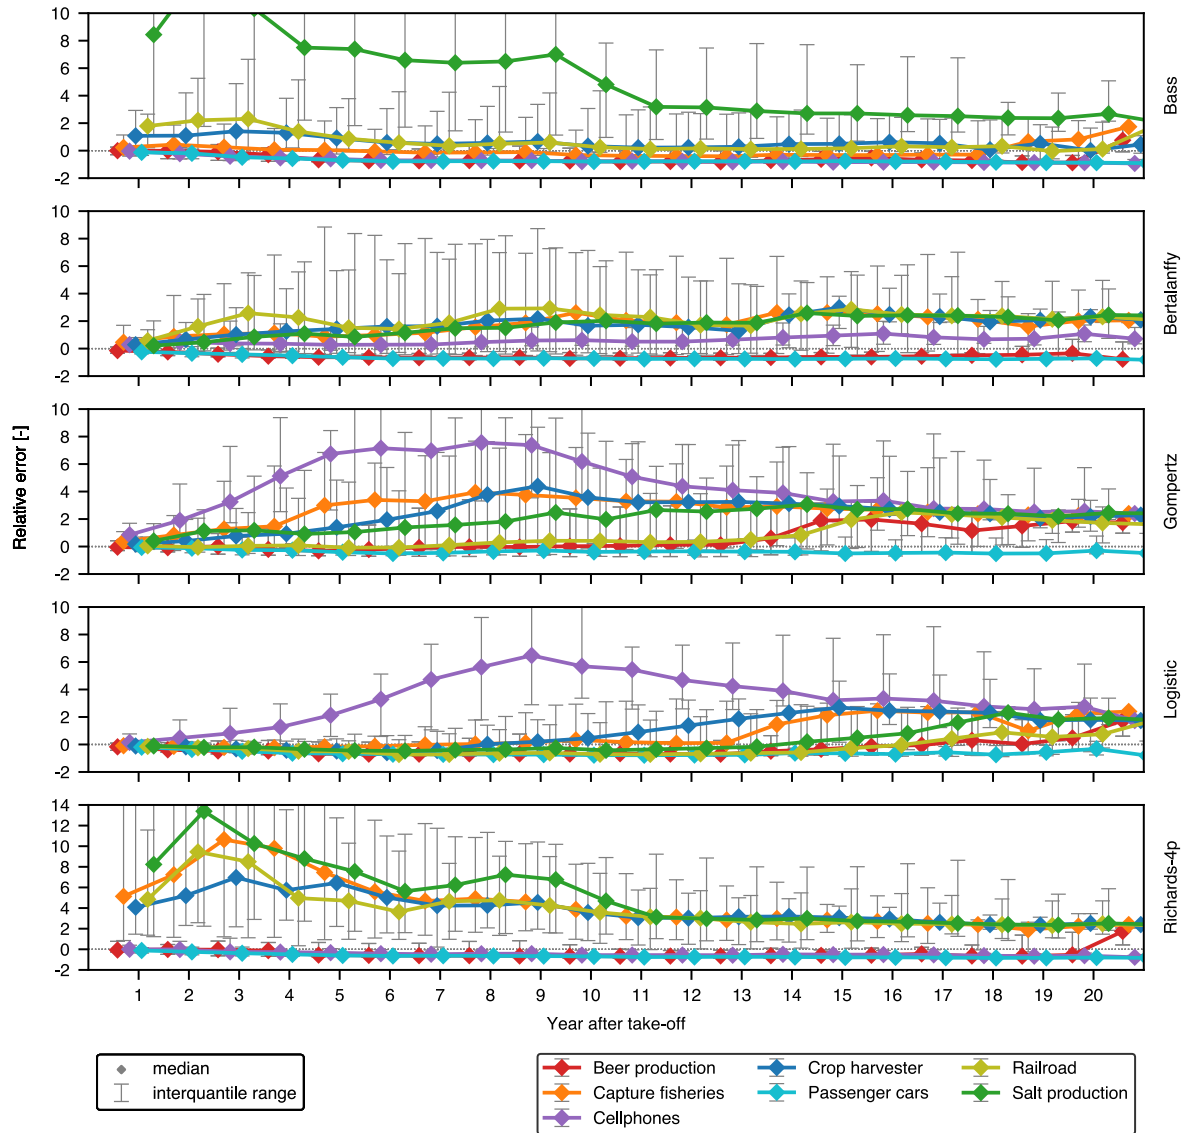

Supplementary Figure 13. Median relative errors with interquartile ranges for projections of growth models based on single analogs across all countries for onshore wind power. The analogs are part of the group with same magnitude of complexity (Table 1). The higher the magnitude of the error, the further away is the projected capacity of onshore wind power from the historically observed capacity. If projected capacities are higher than the corresponding observations, errors are positive. The projected capacities are estimates of a deterministic projection using the substitution model and growth parameters from optimal fits of a growth model to the historical time series of an analog. Supplementary Figures 12 and 14 show percentage errors for other analogs. Supplementary Figures 9-11 show percentage errors for solar PV. Related to Figure 3.

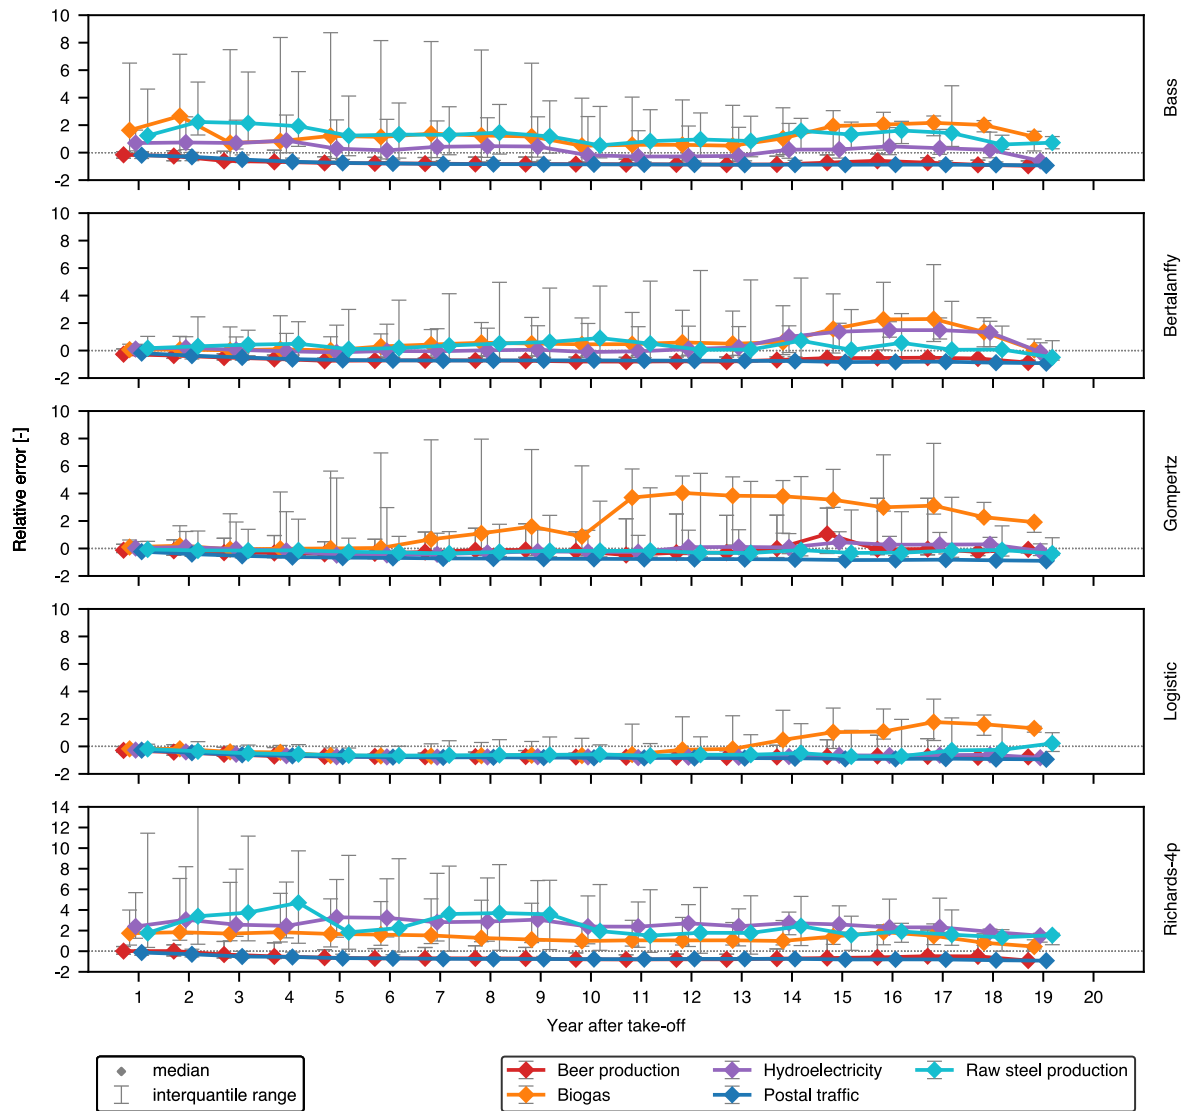

Supplementary Figure 14. Median relative errors with interquartile ranges for projections of growth models based on single analogs across all countries for onshore wind power. The analogs are part of the group with same magnitude of material use (Table 1). The higher the magnitude of the error, the further away is the projected capacity of onshore wind power from the historically observed capacity. If projected capacities are higher than the corresponding observations, errors are positive. The projected capacities are estimates of a deterministic projection using the substitution model and growth parameters from optimal fits of a growth model to the historical time series of an analog. Supplementary Figures 12-13 show percentage errors for other analogs. Supplementary Figures 9-11 show percentage errors for solar PV. Related to Figure 3.

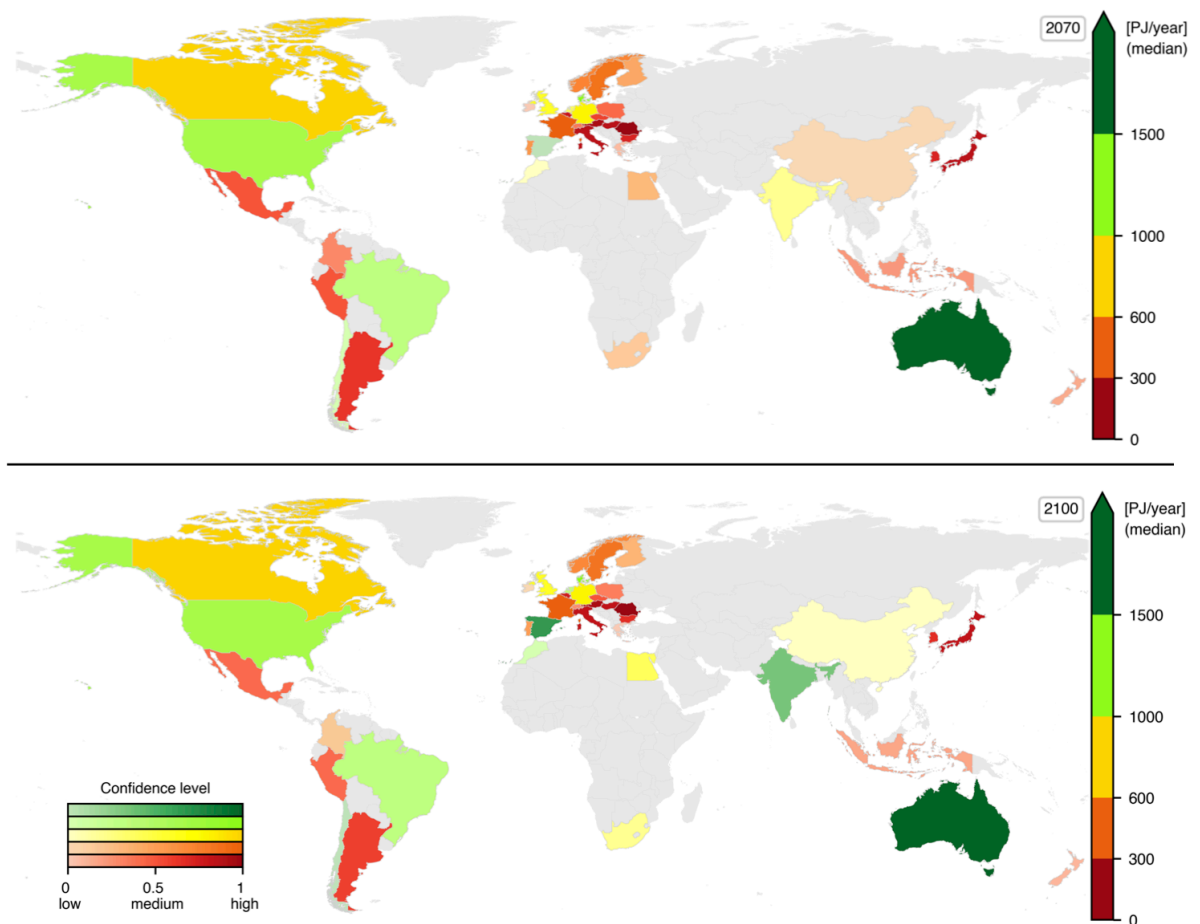

Supplementary Figure 15. Projected median capacities of hydrogen electrolysis with confidence levels per country in 2070 and 2100. The projections are weighted projections of all analog groups (Table 1). The darker the shading, the higher is the confidence level the projected capacity. The confidence level<sup>8</sup> represents the width of a projection in the selected year. Countries in grey have no projections. Geographic boundaries come from Opendatasoft<sup>9</sup>. Related to Figure 4.

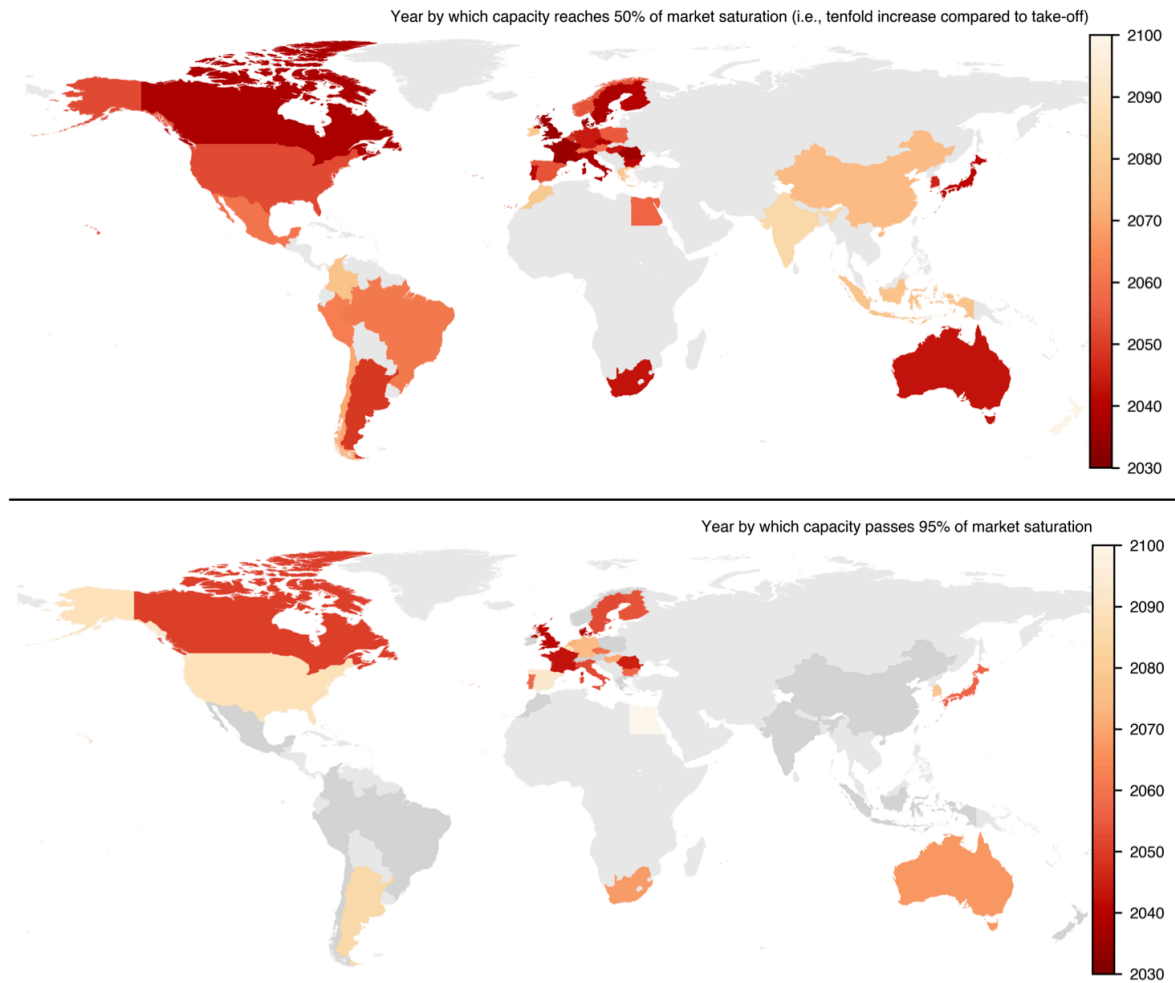

Supplementary Figure 16. Years by which projected median of countries reach 50% and pass 95% of the market saturation of hydrogen electrolysis. The values derive from projections weighted projections of all analog groups (Table 1, Supplementary Figure 1). Countries in dark grey reach the saturation levels after 2100. Countries in light grey have no projections. Geographic boundaries come from Opendatasoft<sup>9</sup>. Related to Figure 4.

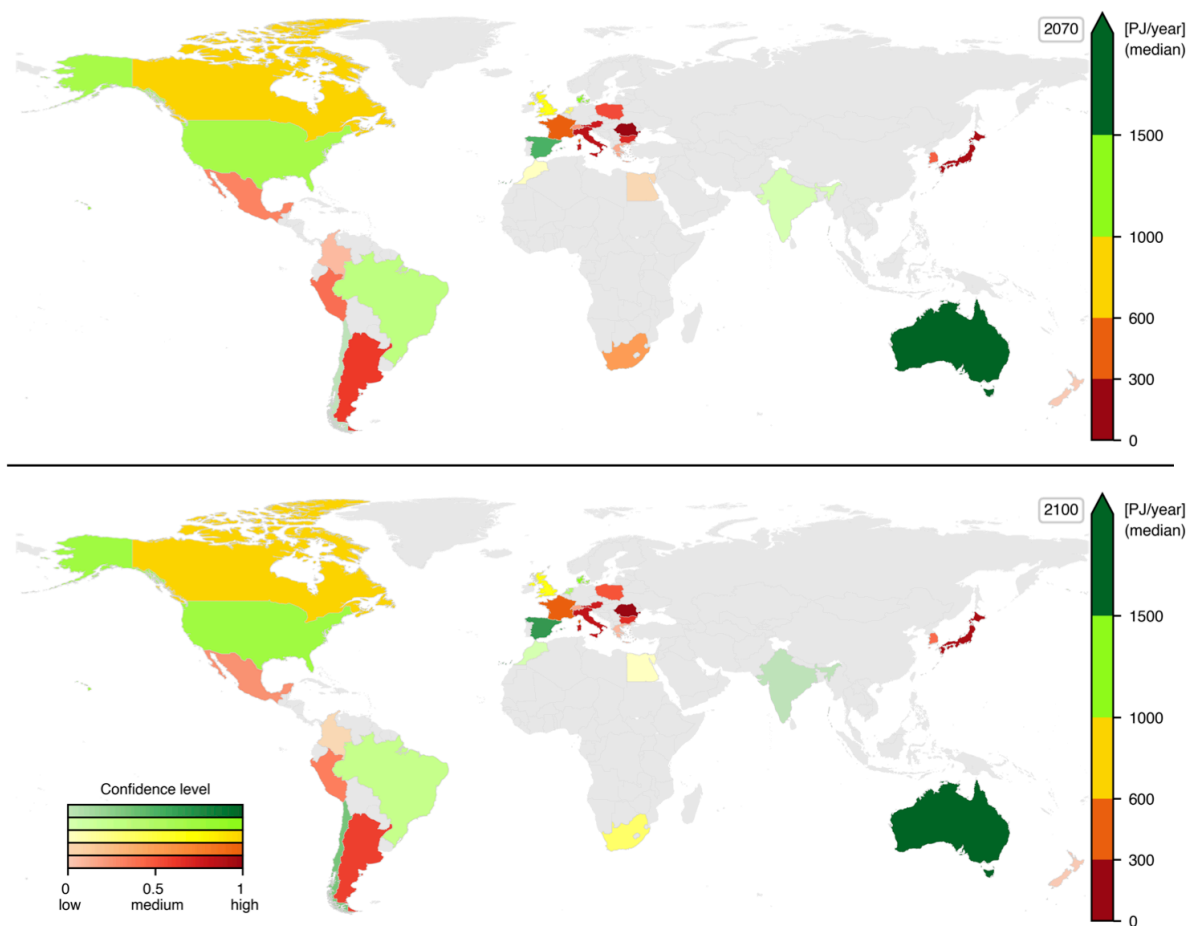

Supplementary Figure 17. Projected median capacities of hydrogen electrolysis with confidence levels per country in 2070 and 2100. The projections use each analog from the three analog groups only once (Table 1), leading to fewer countries with projections if a country does not have historical data for all analogs. The darker the shading, the higher is the confidence level the projected capacity. The confidence level<sup>8</sup> represents the width of a projection in the selected year. Countries in grey have no projections. Geographic boundaries come from Opendatasoft<sup>9</sup>. Related to Figure 4.

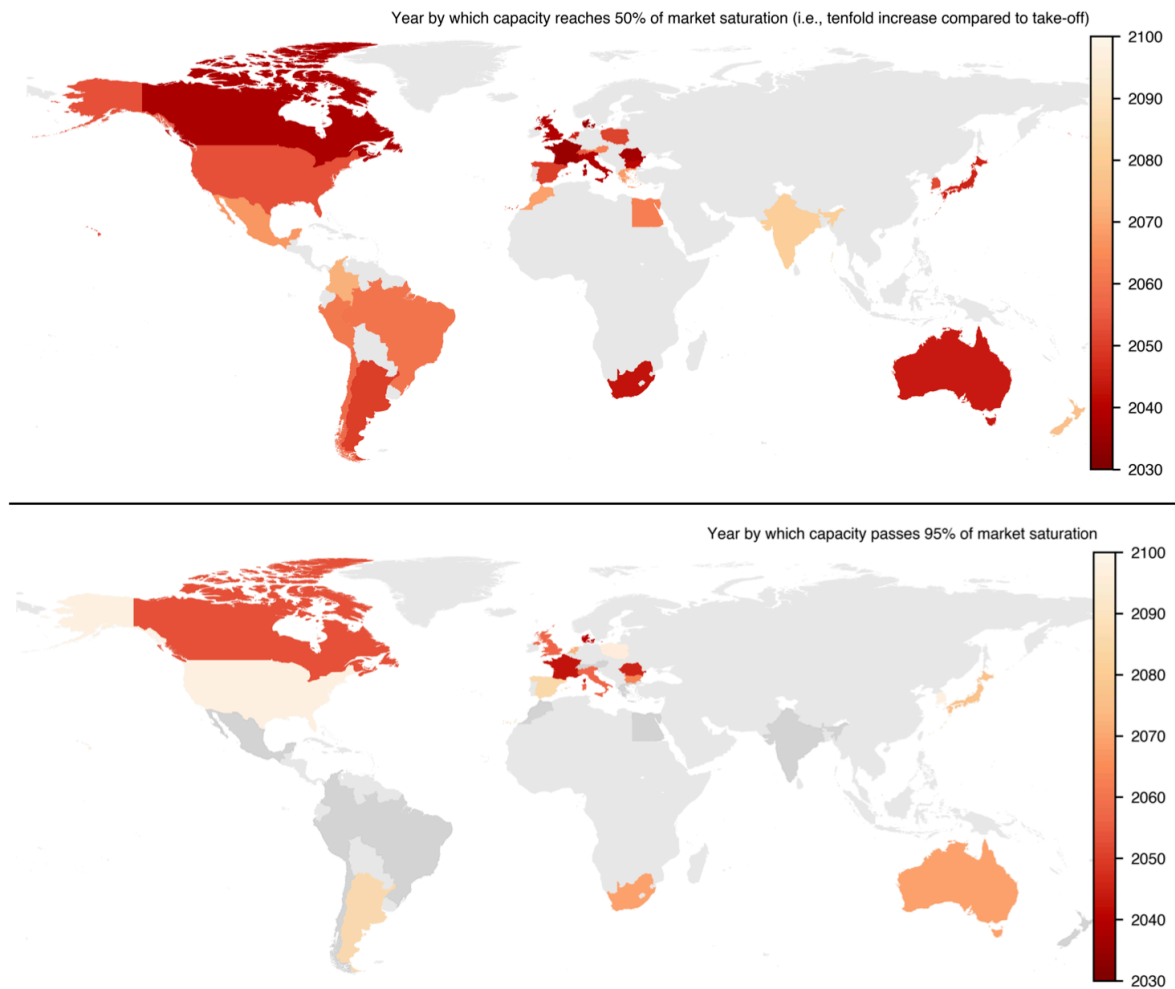

Supplementary Figure 18. Years by which projected median of countries reach 50% and pass 95% of the market saturation of hydrogen electrolysis. The values derive from projections that use each analog from the three analog groups only once (Table 1, Supplementary Figure 2), leading to fewer countries with projections if a country does not have historical data for all analogs. Countries in dark grey reach the saturation levels after 2100. Countries in light grey have no projections. Geographic boundaries come from Opendatasoft<sup>9</sup>. Related to Figure 4.

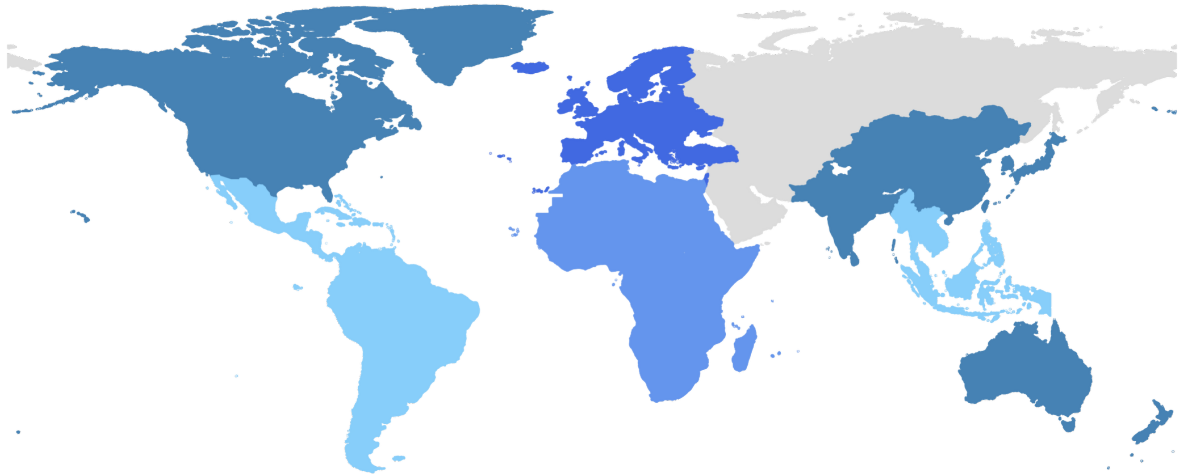

Supplementary Figure 19. Six investigated world regions for hydrogen electrolysis as grouped by International Energy Agency<sup>10</sup> (Supplementary Tables 1-2). Middle East has no projection of hydrogen electrolysis due to insufficient available data on analogs. Geographic boundaries come from Opendatasoft<sup>9</sup>. Related to Table 1.

## Supplementary Tables

Supplementary Table 1. Countries with projections of hydrogen electrolysis per analog group.

| Type of adopter          | Complexity               | Material use             |
|--------------------------|--------------------------|--------------------------|
| Argentina                | Argentina                | Argentina                |
| Australia                | Australia                | Australia                |
| Austria                  | Austria                  | Austria                  |
| Brazil                   | Belgium                  | Brazil                   |
| Bulgaria                 | Brazil                   | Bulgaria                 |
| Canada                   | Bulgaria                 | Canada                   |
| Chile                    | Canada                   | Chile                    |
| China                    | Chile                    | Colombia                 |
| Colombia                 | Colombia                 | Denmark                  |
| Denmark                  | Czechia                  | Egypt                    |
| Egypt                    | Denmark                  | France                   |
| France                   | Egypt                    | Greece                   |
| Germany                  | Finland                  | India                    |
| Greece                   | France                   | Italy                    |
| India                    | Greece                   | Japan                    |
| Indonesia                | Hungary                  | Mexico                   |
| Italy                    | India                    | Morocco                  |
| Japan                    | Ireland                  | Netherlands              |
| Mexico                   | Italy                    | New Zealand              |
| Morocco                  | Japan                    | Peru                     |
| Netherlands              | Mexico                   | Poland                   |
| New Zealand              | Morocco                  | South Korea              |
| Peru                     | Netherlands              | Romania                  |
| Poland                   | New Zealand              | South Africa             |
| Portugal                 | Norway                   | Spain                    |
| South Korea              | Peru                     | Switzerland              |
| Romania                  | Poland                   | United Kingdom           |
| South Africa             | South Korea              | United States of America |
| Spain                    | Romania                  |                          |
| Switzerland              | South Africa             |                          |
| United Kingdom           | Spain                    |                          |
| United States of America | Sweden                   |                          |
|                          | Switzerland              |                          |
|                          | United Kingdom           |                          |
|                          | United States of America |                          |

Supplementary Table 2. World regions with projections of hydrogen electrolysis per analog group. World regions include the projections of countries as grouped by International Energy Agency<sup>10</sup> (Supplementary Figure 16).

| <b>Type of adopter</b>    | <b>Complexity</b>         | <b>Material use</b>       |
|---------------------------|---------------------------|---------------------------|
| Africa                    | Africa                    | Africa                    |
| Asia Pacific              | Asia Pacific              | Asia Pacific              |
| Central and South America | Central and South America | Central and South America |
| Europe                    | Europe                    | Europe                    |
| North America             | North America             | North America             |
| Southeast Asia            | Southeast Asia            | Southeast Asia            |

Supplementary Table 3. Countries with projections of solar PV per analog group.

| Type of adopter          | Complexity               | Material use             |
|--------------------------|--------------------------|--------------------------|
| Argentina                | Albania                  | Argentina                |
| Australia                | Argentina                | Australia                |
| Austria                  | Australia                | Austria                  |
| Belgium                  | Austria                  | Belgium                  |
| Brazil                   | Belgium                  | Brazil                   |
| Canada                   | Brazil                   | Canada                   |
| Chile                    | Cambodia                 | Chile                    |
| Denmark                  | Canada                   | China                    |
| Finland                  | Chile                    | Denmark                  |
| France                   | Costa Rica               | Finland                  |
| Greece                   | Cuba                     | France                   |
| Hungary                  | Dominican Republic       | Hungary                  |
| India                    | France                   | India                    |
| Israel                   | Germany                  | Indonesia                |
| Italy                    | Greece                   | Israel                   |
| Japan                    | Guinea                   | Italy                    |
| Kenya                    | Guyana                   | Mexico                   |
| Mexico                   | Israel                   | Morocco                  |
| Morocco                  | Italy                    | Netherlands              |
| Netherlands              | Kenya                    | New Zealand              |
| New Zealand              | Kuwait                   | Norway                   |
| Norway                   | Laos                     | Philippines              |
| Pakistan                 | Lebanon                  | Poland                   |
| Poland                   | Luxembourg               | Portugal                 |
| South Korea              | Malaysia                 | South Korea              |
| Romania                  | Mauritius                | Romania                  |
| South Africa             | Mexico                   | South Africa             |
| Spain                    | Morocco                  | Spain                    |
| Sri Lanka                | Namibia                  | Sweden                   |
| Sweden                   | New Zealand              | Switzerland              |
| Switzerland              | Peru                     | Turkey                   |
| Turkey                   | Philippines              | Thailand                 |
| Tunisia                  | Poland                   | United Kingdom           |
| United Kingdom           | Portugal                 | United States of America |
| United States of America | Rwanda                   |                          |
| Uruguay                  | Saudi Arabia             |                          |
|                          | South Africa             |                          |
|                          | Spain                    |                          |
|                          | Sri Lanka                |                          |
|                          | Sweden                   |                          |
|                          | Turkey                   |                          |
|                          | Togo                     |                          |
|                          | Tunisia                  |                          |
|                          | United States of America |                          |
|                          | Uruguay                  |                          |

Supplementary Table 4. Countries with projections of onshore wind power per analog group.

| Type of adopter          | Complexity               | Material use             |
|--------------------------|--------------------------|--------------------------|
| Australia                | Argentina                | Australia                |
| Brazil                   | Australia                | Belgium                  |
| Canada                   | Austria                  | Brazil                   |
| France                   | Bolivia                  | Canada                   |
| Indonesia                | Brazil                   | Finland                  |
| Israel                   | Bulgaria                 | France                   |
| Mexico                   | Canada                   | Hungary                  |
| Pakistan                 | Chile                    | Indonesia                |
| Philippines              | China                    | Israel                   |
| Poland                   | Cuba                     | Mexico                   |
| South Korea              | Egypt                    | Philippines              |
| Romania                  | France                   | Poland                   |
| South Africa             | Indonesia                | South Korea              |
| Switzerland              | Israel                   | Romania                  |
| Turkey                   | Italy                    | South Africa             |
| Thailand                 | Japan                    | Sweden                   |
| United States of America | Kenya                    | Switzerland              |
|                          | Mexico                   | Turkey                   |
|                          | Morocco                  | Thailand                 |
|                          | New Zealand              | United States of America |
|                          | Philippines              |                          |
|                          | Poland                   |                          |
|                          | Portugal                 |                          |
|                          | South Korea              |                          |
|                          | Romania                  |                          |
|                          | Russia                   |                          |
|                          | South Africa             |                          |
|                          | Switzerland              |                          |
|                          | Turkey                   |                          |
|                          | Thailand                 |                          |
|                          | United Kingdom           |                          |
|                          | United States of America |                          |
|                          | Venezuela                |                          |

Supplementary Table 5. Out-of-sample performance of projections with different groups of analogs. The scores are means over all hindcasting years and countries for both solar PV and onshore wind power. The higher a score, the lower the performance. The weighting score is the inverse of the mean squared of the weighted interval performance indicator<sup>8</sup>.

|                                         | Type of adopter | Complexity | Material use |
|-----------------------------------------|-----------------|------------|--------------|
| Mean absolute percentage error          | 0.76            | 0.78       | 0.74         |
| Calibration                             | 1.54            | 1.21       | 1.48         |
| Sharpness                               | 1.36            | 2.44       | 1.16         |
| Out-of-interval count                   | 0.10            | 0.08       | 0.08         |
| Weighted interval performance indicator | 1.66            | 1.54       | 1.67         |
| Weighting score                         | 0.32            | 0.35       | 0.33         |

Supplementary Table 6. Out-of-sample performance of projections with growth models. The scores are means over all hindcasting years and countries for both solar PV and onshore wind power. The weighting score is the inverse of the mean squared of the weighted interval performance indicator<sup>8</sup>.

|                                         | Bass | Bertalanffy | Gompertz | logistic | Richards-4p |
|-----------------------------------------|------|-------------|----------|----------|-------------|
| Mean absolute percentage error          | 0.75 | 0.73        | 0.75     | 0.75     | 0.91        |
| Calibration                             | 1.14 | 1.12        | 1.33     | 2.05     | 1.27        |
| Sharpness                               | 2.39 | 1.74        | 1.46     | 0.38     | 3.85        |
| Out-of-interval count                   | 0.00 | 0.07        | 0.83     | 0.31     | 0.00        |
| Weighted interval performance indicator | 1.53 | 1.28        | 1.43     | 1.95     | 2.06        |
| Weighting score                         | 0.22 | 0.29        | 0.22     | 0.13     | 0.12        |

## References

1. Greene, J., Gidden, M. J., Brutschin, E. & Nemet, G. F. Drivers of technology diffusion speed across countries [in review].
2. National Renewable Energy Laboratory (NREL). Annual Technology Baseline. Available at <https://atb.nrel.gov/electricity/2024/technologies>. Accessed 24 October 2024. (2024).
3. Wei, X. *et al.* Comparative life cycle analysis of electrolyzer technologies for hydrogen production: Manufacturing and operations. *Joule* **8**, 3347–3372 (2024).
4. Malhotra, A. & Schmidt, T. S. Accelerating Low-Carbon Innovation. *Joule* **4**, 2259–2267 (2020).
5. U.S. Energy Information Administration. Annual Energy Outlook 2025. Available at <https://www.eia.gov/outlooks/aeo/>. Accessed 4 November 2025.  
<https://www.eia.gov/outlooks/aeo/> (2025).
6. U.S. Energy Information Administration. Annual Energy Outlook 2025 - Hydrogen Market Projections. Available at <https://www.eia.gov/outlooks/aeo/data/browser/#/?id=23-AEO2025&cases=ref2025&sourcekey=0>. Accessed 30 October 2025. (2025).
7. Clean Air Task Force. Units Conversion Worksheet - Version 30 March 2021. Available at <https://www.catf.us/wp-content/uploads/2021/03/CATF-Zero-Carbon-Fuels-Cheat-Sheet.pdf>. (2021).
8. Zielonka, N. & Trutnevyte, E. Probabilities of reaching required diffusion of granular energy technologies in European countries. *iScience* **28**, 111825 (2025).
9. Opendatasoft. World Administrative Boundaries - Countries and Territories. Available at <https://public.opendatasoft.com/explore/embed/dataset/world-administrative-boundaries/map/?location=2,40.35324,24.60938&basemap=jawg.light>. Accessed 15 August 2025. (2025).
10. International Energy Agency. Hydrogen Production and Infrastructure Projects Database - Hydrogen production projects (Update 5 March 2025).

<https://www.iea.org/data-and-statistics/data-product/hydrogen-production-and-infrastructure-projects-database#hydrogen-production-and-infrastructure-projects> (2025).
